# Supplementary material for: Anandamide alters the membrane properties, halts the cell division and prevents drug efflux in multidrug resistant Staphylococcus aureus
Source: PubMed Central journal article supplement (PMC8062478; doi:10.1038/s41598-021-88099-6), 2021-04-22
Supplement: 41598_2021_88099_MOESM1_ESM.pdf [file 41598_2021_88099_MOESM1_ESM.pdf]

## Supplementary Data

# **ANANDAMIDE ALTERS THE MEMBRANE PROPERTIES, HALTS THE CELL DIVISION AND PREVENTS DRUG EFFLUX IN MULTIDRUG RESISTANT *STAPHYLOCOCCUS AUREUS***

Shreya Banerjee, Ronit Vogt Sionov, Mark Feldman, Reem Smoum,  
Raphael Mechoulam, and Doron Steinberg

## Control 2h

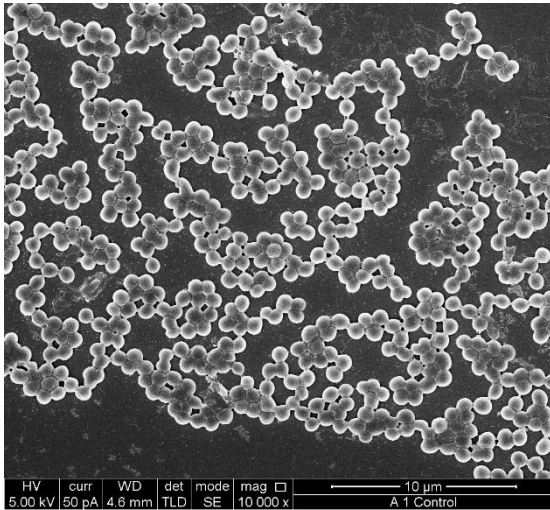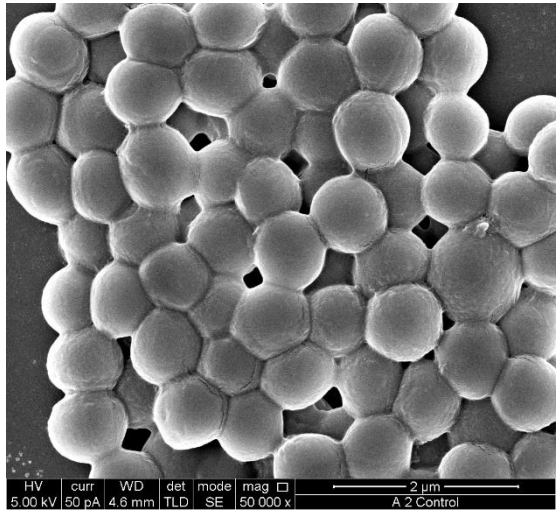

## 25 μg/ml AEA 2h

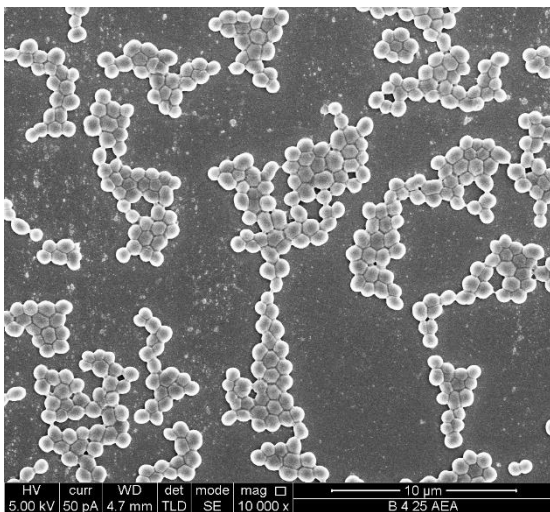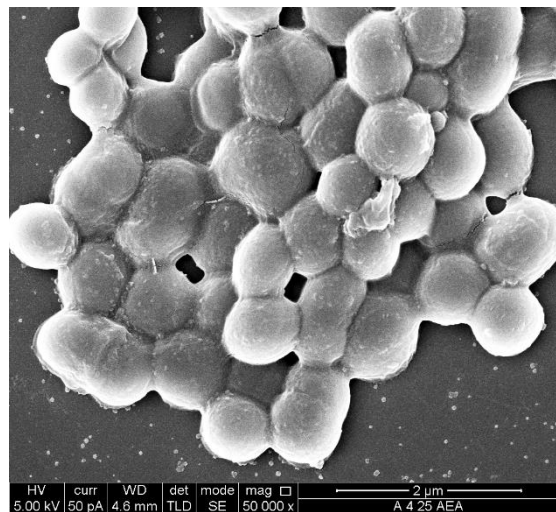

**Suppl. Figure 1.** SEM pictures of control MDRSA CI-M bacteria incubated for 2h or bacteria treated with 25 μg/ml AEA for 2h. Two different magnifications are shown.

## Control 2h

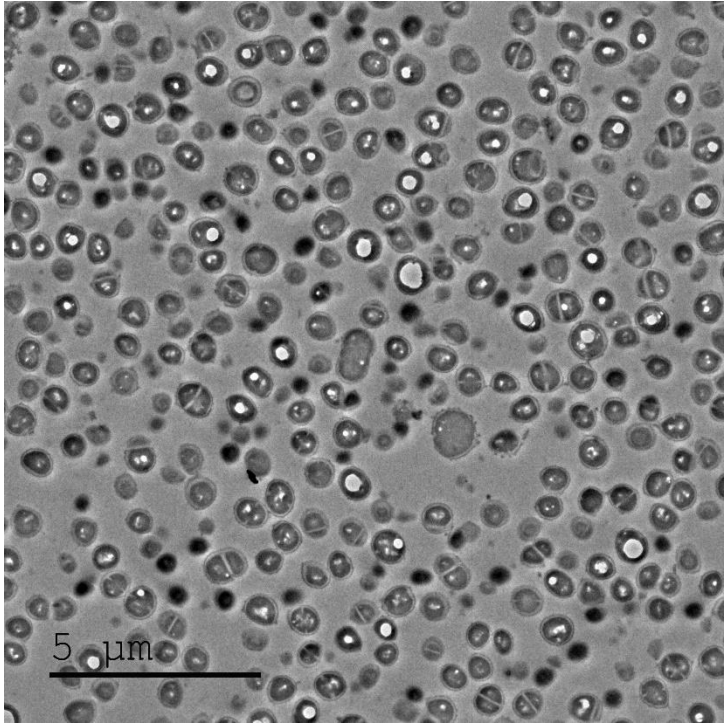

## 50 μg/ml AEA 2h

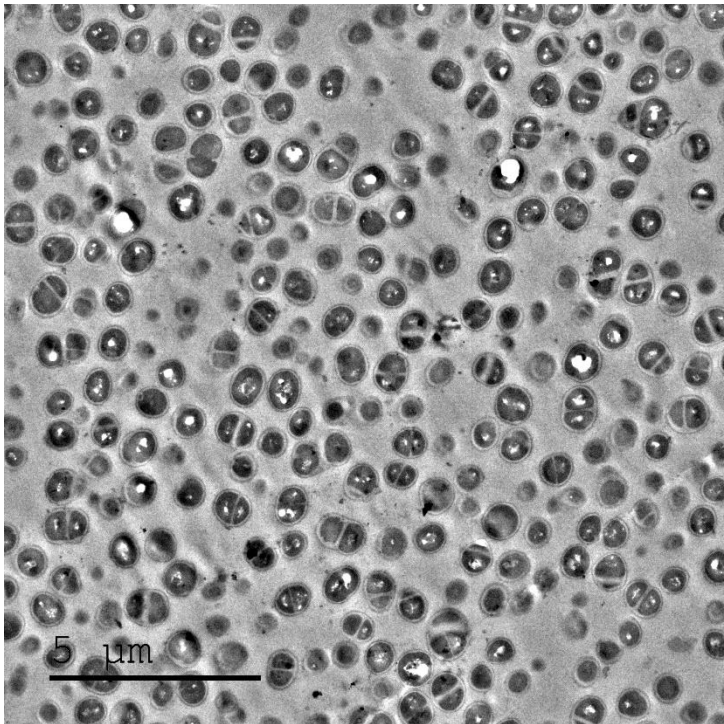

**Suppl. Figure 2.** TEM pictures of control MDRSA CI-M bacteria incubated for 2h or bacteria treated with 50 μg/ml AEA for 2 h. A low magnification is shown to get a general overview of the two cultures.

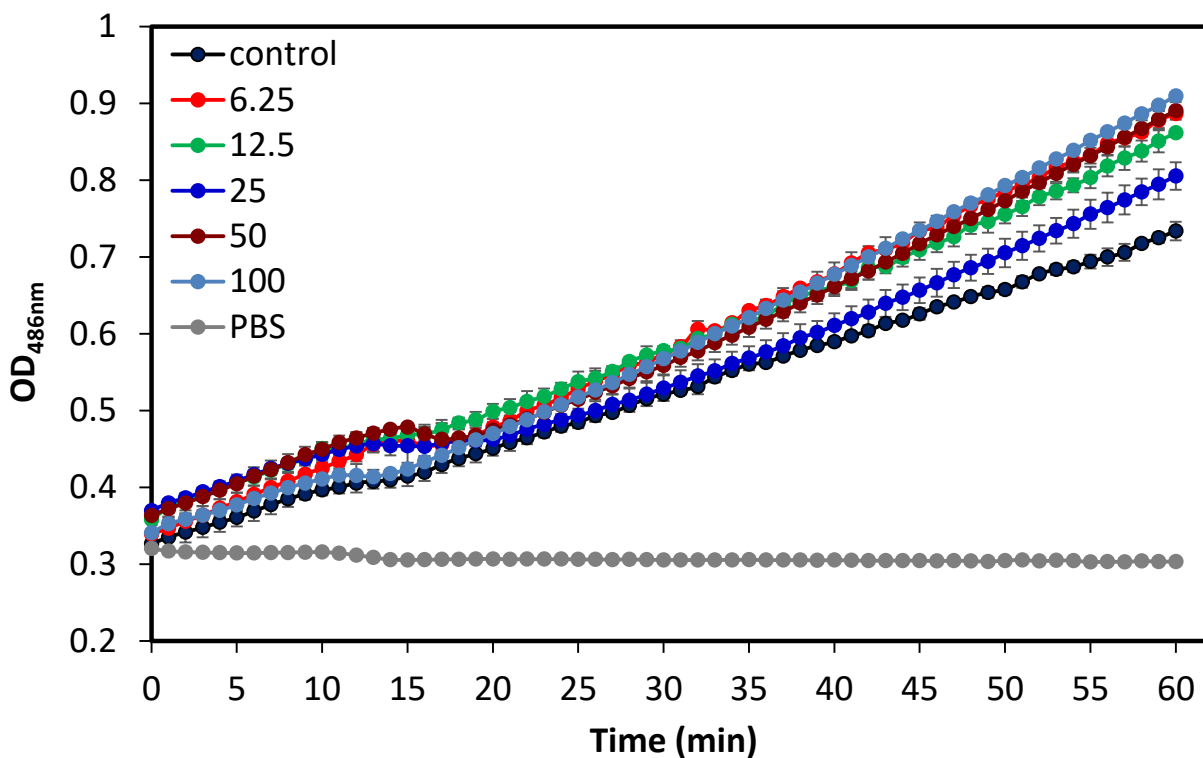

**Suppl. Fig. 3.** Anandamide (AEA) does not affect the  $\beta$ -lactamase activity. Control and AEA-treated MDRSA CI-M after a 30 min incubation were exposed to 0.1 mM Nitrocefin, and the hydrolysis of nitrocefin was monitored each minute for 60 min by measuring the degraded red nitrocefin that absorbs at 486nm.

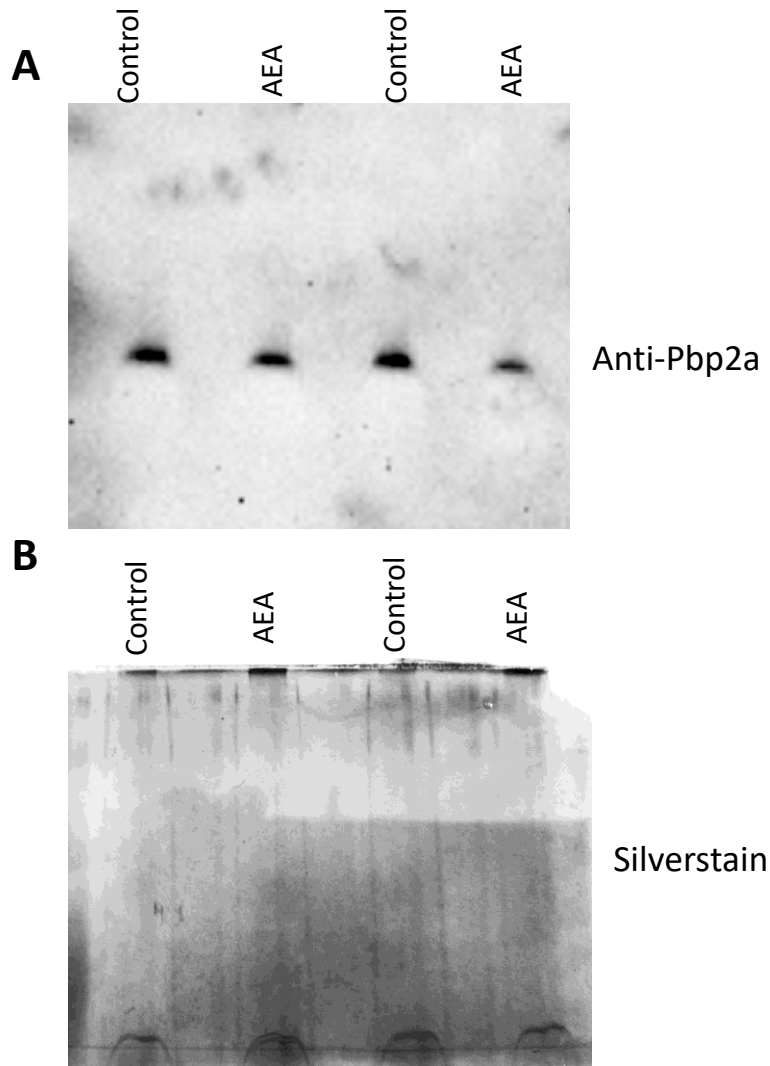

**Suppl. Fig. 4. A.** The original Western blot of Pbp2a of Fig. 11B run in a non-reduced 3-12% gradient PAGE. **B.** The Silverstain of the same samples in the PAGE gel.
