# Supplementary material for: Anandamide alters the membrane properties, halts the cell division and prevents drug efflux in multidrug resistant Staphylococcus aureus
Source: PubMed Central journal article supplement (PMC8062478; doi:10.1038/s41598-021-88099-6), 2021-04-22
Supplement: 41598_2021_88099_MOESM2_ESM.pdf [file 41598_2021_88099_MOESM2_ESM.pdf]

Anandamide alters the membrane properties, halts the cell division and prevents drug efflux in multidrug resistant *Staphylococcus aureus*

Shreya Banerjee, Ronit Vogt Sionov, Mark Feldman, Reem Smoum,  
Raphael Mechoulam, and Doron Steinberg

Suppl. Table 1. Primers used for real-time PCR of *S. aureus*

| Gene          | Forward Primer                | Reverse Primer                 | Ref |
|---------------|-------------------------------|--------------------------------|-----|
| 16S rRNA      | CCAGCAGCCGCGGTAAT             | CGCGCTTTACGCCAATA              | 1   |
| <i>agrA</i>   | AAAGTTGCAGCGATGGATTT          | ATGGGCAATGAGTCTGTGAG           | 1   |
| <i>agrC</i>   | CATTCGCGTTGCATTTATTG          | CCTAAACCACGACCTTCACC           | 2   |
| <i>atl</i>    | GACCCTGCTATTGTCCAACC          | CGCTGATTGATTAGCACGAG           | 3   |
| <i>aur</i>    | CAAAAGAGTGATGCGGTCAA          | AGGTGCATGAACACCATCAA           | 2   |
| <i>capA</i>   | CAGTTAAAGTCGCACCAA            | GAACCCAATACAGGCAAT             | 1   |
| <i>clfA</i>   | ACCCAGGTTTCAGATTCTGGCAGCG     | TCGCTGAGTCGGAATCGCTTGCT        | 1   |
| <i>cna</i>    | AATAGAGGCGCCACGACCGT          | GTGCCTTCCCAAACCTTTTGAGCA       | 1   |
| <i>crtM</i>   | ATCCAGAACCACCCGTTTTT          | GCGATGAAGGTATTGGCATT           | 2   |
| <i>crtN</i>   | GATGAAGCTTTGACGCAACA          | TTCGCATGATACGTTTGCTC           | 2   |
| <i>divIB</i>  | CGACTCGATTGATGAGGAAAC         | TTGTGCTTACGTCTTAACTTCC         | 3   |
| <i>divIC</i>  | ATGCGTGTTGTTTCGTAGGC          | CGCTCCTGTGCATCAATATC           | 3   |
| <i>divIVA</i> | GATCGCGTTTCCGTATGTTAG         | TCAAGCGTCACTTGTTGAGC           | 3   |
| <i>ebps</i>   | GGTGCAGCTGGTGCAATGGGTGT       | GCTGCGCCTCCAGCCAAACCT          | 1   |
| <i>eno</i>    | TGCCGTAGGTGACGAAGGTGGTT       | GCACCGTGTTTCGCTTCGAACT         | 1   |
| <i>ezrA</i>   | ATTGGTGAGGCAGCAAGTC           | GCTATATGGTTGTGCGCTTG           | 3   |
| <i>fib</i>    | CGTCAACAGCAGATGCGAGCG         | TGCATCAGTTTTTCGCTGCTGGTTT      | 1   |
| <i>fmhB</i>   | AAGCGAGGTACGACAGTAGAACG       | CATCTCCATCTTCATGCAACGCA        | 4   |
| <i>fnbA</i>   | AAATTGGGAGCAGCATCAGT          | GCAGCTGAATTCCCATTTTC           | 1   |
| <i>fnbB</i>   | AAGAAGCACCGAAAACGTGTG         | TCTCTGCAACTGCTGTAACG           | 2   |
| <i>ftsA</i>   | GGCGAGAAATTTCACAATGG          | TGTGTCTTTGATTGCTTGTCG          | 3   |
| <i>ftsH</i>   | GATTGATGCTGTTGGTCGTC          | CCGAAACCATCCATTTCAA            | 3   |
| <i>ftsL</i>   | GATACGCGAGGAAAGATTGC          | ATCGTTCTCAAGGCTCATCC           | 3   |
| <i>ftsZ</i>   | AAAGCTGCAGAGGAATCTCG          | TTTAGCAACGACTGGTGCTG           | 3   |
| <i>ftsW</i>   | CTTGTGTGTGTTGGGATTGC          | TTGATGATCCACCAAAGCTG           | 3   |
| <i>glyA</i>   | CTACAAACTCACAGCCAC            | GTATCGGAAGCGGTTATG             | 5   |
| <i>gmk</i>    | CCATCTGGAGTAGGTAAGG           | CTACGCCATCAACTTCAC             | 5   |
| <i>gtf</i>    | TGGTGACGCCGAAGGACTC           | GCAGCACGAGCAGGAACAC            | 1   |
| <i>gyrA</i>   | TGGCCCAAGACTTTAGTTATCGTTATCC  | TGGGGAGGAATATTTGTAGCCATACCTAC  | 6   |
| <i>gyrB</i>   | GGTGCTGGGCAAATAACAAGT         | TCCCACACTAAATGGTGCAA           | 2   |
| <i>hla</i>    | AATGAATCCTGTCGCTAATGCCGC      | CTGAAGGCCAGGCTAAACCACCTT       | 1   |
| <i>hld</i>    | TAATTAAGGAAGGAGTGATTTCAATG    | TTTTTAGTGAATTTGTTCACTGTGTC     | 1   |
| <i>icaA</i>   | ACACTTGCTGGCGCAGTCAA          | TCTGGAACCAACATCCAACA           | 7   |
| <i>icaB</i>   | ATGGTCAAGCCCAGACAGAG          | AGTATTTTCAATGTTTAAAGCA         | 7   |
| <i>icaC</i>   | CTTGGGTATTTGCACGCATT          | GCAATATCATGCCGACACCT           | 1   |
| <i>kdpA</i>   | ATTGTTCCGTTTATTGTCC           | CATCATACTGCCATTTCT             | 1   |
| <i>lytA</i>   | TGGTGGTGCAAAGTTCATTC          | TATCTGCCAGCGAATGTC             | 3   |
| <i>lytM</i>   | TCAGCAAGTAAAGCGACAGC          | TTTCAGGCATTGCATAGTCG           | 3   |
| <i>lytN</i>   | TGCCAATGACACCATTAGTAGAAC      | ACCGTCGAAATCCCATCC             | 3   |
| <i>mecA</i>   | AACCGAAGATAAAAAAGAACC         | GTCCGTAACCTGAATCAGC            | 1   |
| <i>mecR1</i>  | GTGCTCGTCTCCACGTTAATTCCA      | GACTAACC GAAGAAGTCGTGTCAG      | 4   |
| <i>mdeA</i>   | CTTTCAGGTTACCTTGTGAATATTTAAAC | ATCAATAGGTACTTTAATTGTAGTTCCAAC | 1   |
| <i>mepA</i>   | ATGGTATAGGTTTCTTGTACTGGTATG   | AATGATAATTGCACCTTGTAATAATGGC   | 1   |
| <i>mgrA</i>   | AGTACAATCTAACATACC            | TTGCGATAAAGAAGAAGC             | 1   |
| <i>norA</i>   | GACATTTACCAAGCCATCAA          | TGCCATAAATCCACCAATCC           | 1   |

|                               |                                      |                                |   |
|-------------------------------|--------------------------------------|--------------------------------|---|
| <i>norB</i>                   | GCTACACCATCAACAGATACAGCAA            | ACTCAATGCGACGCCAAA             | 1 |
| <i>norC</i>                   | TGGGTTGGAGATGGATTTTC                 | ACAATTAGCCCTGCAACGTC           | 1 |
| <i>nuc</i>                    | GCGATTGATGGTGATACGGTT                | AGCCAAGCCTTGACGAACTAAAGC       | 2 |
| <i>opp1C</i>                  | CGTGCCTGTGATGTTATGTTGGCA             | ITCGGCACCCATTCCAAACAATGC       | 4 |
| <i>oppF</i>                   | GGTGGGCAACGTCAGCGTGTA                | GGACACTGCCTCGTCGCAAACA         | 4 |
| <i>pbp2</i>                   | CGTTTCTACGAACATGGCGCAC               | GGCACCTCAGAACCAAATCCACCA       | 4 |
| <i>proC</i>                   | GGCAGGTATTCCGATTGA                   | CCAGTAACAGAGTGTCCAAC           | 5 |
| <i>psm<math>\alpha</math></i> | TATCAAAAGCTTAATCGAACAATTC            | CCCCTTCAAATAAGATGTTTCATATC     | 2 |
| <i>qacA/B</i>                 | GGTGCTTTAATAATGCC                    | CCAGTCCAATCATGCCTGC            | 1 |
| <i>recF</i>                   | AGTTATAGACACGGCACG                   | GCGTCGTCTTATTTGAGG             | 5 |
| <i>rho</i>                    | GGAAGATACGACGTTTCAGAC                | GAAGCGGGTGGAAAGTTTA            | 5 |
| <i>RNAII</i>                  | TATGAATAAATGCGCTGATGATATACCACG       | TTTTAAAGTTGATAGACCTAAACCACGACC | 6 |
| <i>RNAIII</i>                 | GCACTGAGTCCAAGGAACTAACTCT            | AGCCATCCCAACTTAATAACCATGT      | 2 |
| <i>rpoB</i>                   | TCCTGTTGAACGCGCATGTAA                | GCTGGTATGGCTCGTGATGGTA         | 8 |
| <i>saeR</i>                   | AAGTGGCGACCATTACAT                   | CATTATTGCCTCAAATACGT           | 1 |
| <i>saeS</i>                   | TGCCAATACCTTCATCGCTAA                | CAATATCGAACGCCACTTGA           | 7 |
| <i>sarA</i>                   | GACATACATCAGCGAAAA                   | TACGTTGTTGTGCATTAA             | 1 |
| <i>sdrM</i>                   | CAACATGGCATTGGTTATTCTAC              | ACAGCTGTTGGTTTAATAAAGC         | 1 |
| <i>sepA</i>                   | GAAGTATGTACGATAACCTATTATATTATG<br>GC | AAAGTCGCGCCTCTAAAATATGC        | 1 |
| <i>sepF</i>                   | GCGGTACTGTTTATGCAATCG                | TGGTCTGTAATGCTTCCAGCTAC        | 3 |
| <i>sle1</i>                   | TCAGGATCTGCAACAACGAC                 | CCTTTACCAATTTTCAGCACGAC        | 3 |
| <i>spsB</i>                   | CCAGCAAATTGTTGTTGTGCTAG              | AAGCCAAAGCCGATTCACTC           | 7 |

## References

1. Salaheen, S., Peng, M., Joo, J., Teramoto, H. & Biswas, D. Eradication and sensitization of methicillin resistant *Staphylococcus aureus* to methicillin with bioactive extracts of berry pomace. *Front Microbiol* **8**, 253, doi:10.3389/fmicb.2017.00253 (2017).
2. Valliammai, A. *et al.* 5-Dodecanolide interferes with biofilm formation and reduces the virulence of Methicillin-resistant *Staphylococcus aureus* (MRSA) through up regulation of agr system. *Sci Rep* **9**, 13744, doi:10.1038/s41598-019-50207-y (2019).
3. Wassmann, C. S., Højrup, P. & Klitgaard, J. K. Cannabidiol is an effective helper compound in combination with bacitracin to kill Gram-positive bacteria. *Sci Rep* **10**, 4112, doi:10.1038/s41598-020-60952-0 (2020).
4. Chung, P. Y., Chung, L. Y. & Navaratnam, P. Transcriptional profiles of the response of methicillin-resistant *Staphylococcus aureus* to pentacyclic triterpenoids. *PLoS One* **8**, e56687, doi:10.1371/journal.pone.0056687 (2013).
5. Theis, T., Skurray, R. A. & Brown, M. H. Identification of suitable internal controls to study expression of a *Staphylococcus aureus* multidrug resistance system by quantitative real-time PCR. *J Microbiol Methods* **70**, 355-362, doi:10.1016/j.mimet.2007.05.011 (2007).
6. Eleaume, H. & Jabbouri, S. Comparison of two standardisation methods in real-time quantitative RT-PCR to follow *Staphylococcus aureus* genes expression during *in vitro* growth. *J Microbiol Methods* **59**, 363-370, doi:10.1016/j.mimet.2004.07.015 (2004).
7. Sethupathy, S., Vigneshwari, L., Valliammai, A., Balamurugan, K. & Pandian, S. K. L-Ascorbyl 2, 6-Dipalmitate inhibits biofilm and virulence in methicillin-resistant *Staphylococcus aureus* and prevents triacylglyceride accumulation in *Caenorhabditis elegans*. *RSC Adv* **7**, 23392-23406 doi:10.1039/c7ra02934a (2017).
8. Baroja, M. L. *et al.* The SaeRS Two-Component System Is a Direct and Dominant Transcriptional Activator of Toxic Shock Syndrome Toxin 1 in *Staphylococcus aureus*. *J Bacteriol* **198**, 2732-2742, doi:10.1128/jb.00425-16 (2016).
